# Supplementary material for: Improving Physicochemical Stability of Quercetin-Loaded Hollow Zein Particles with Chitosan/Pectin Complex Coating
Source: MDPI journal article supplement (doi:10.3390/antiox10091476), 2021-09-16
Supplement: s1 [file s1]

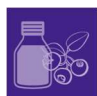

Supplementary Materials:

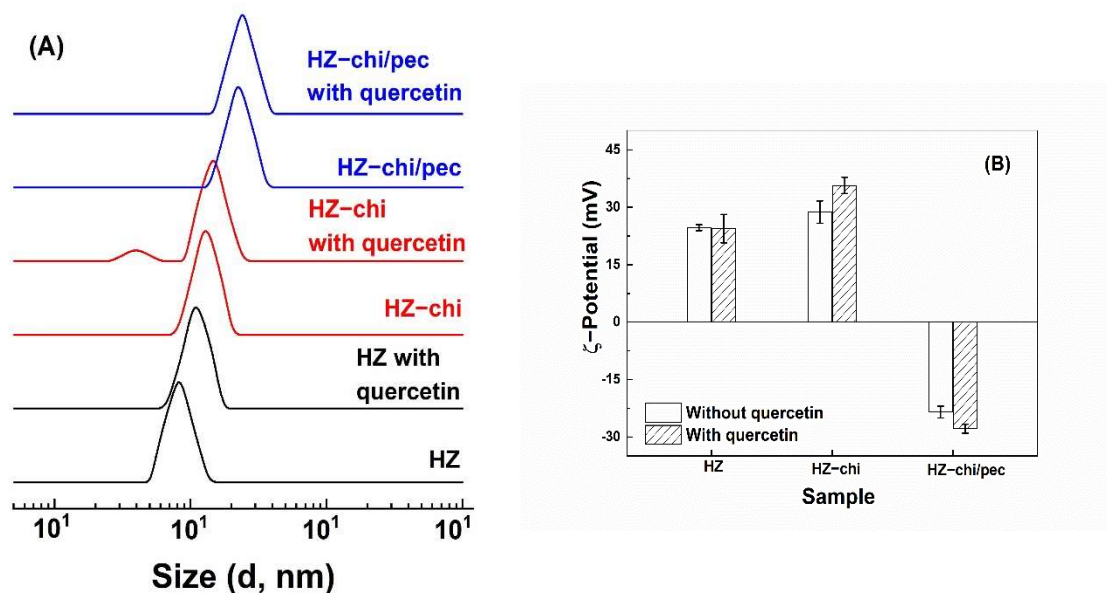

Figure S1. Size distribution (A) and  $\zeta$ -potential (B) of hollow zein (HZ) particles coated with chitosan (HZ-chi) and with chitosan and pectin (HZ-chi/pec) without and with quercetin.

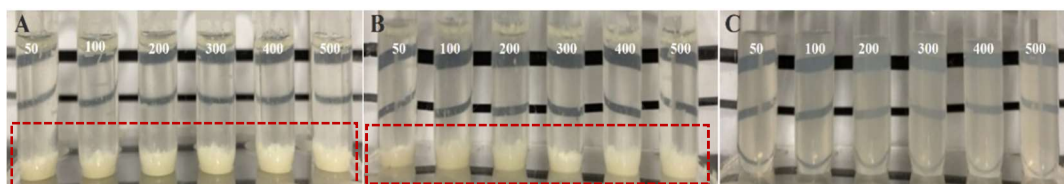

Figure S2. Visual appearance of quercetin-loaded hollow zein particles (A) coated with chitosan (B) and with chitosan and pectin (C) at 50 - 500 mM NaCl.

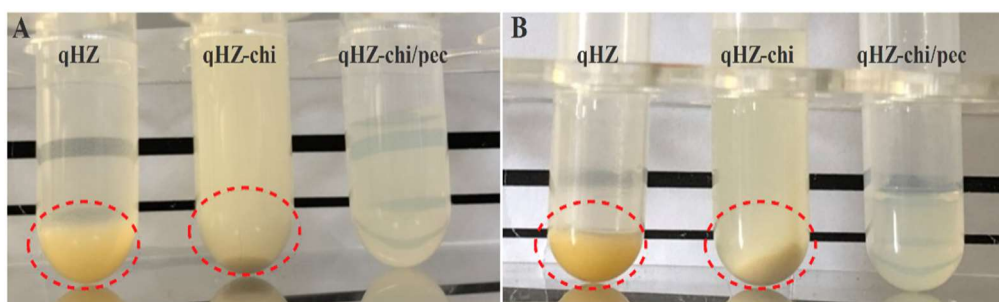

Figure S3. Visual appearance of qHZ, qHZ-chi, qHZ-chi/pec at 25°C (A), 45°C (B).

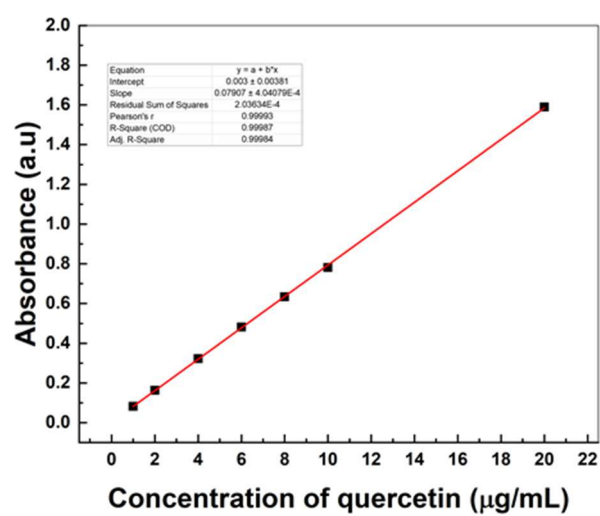

Figure S4. Calibration curve of quercetin
