# Supplementary material
Source: MDPI journal article supplement (https://www.mdpi.com/2076-3921/10/9/1476)
Supplement: s1 [file s1]

Archive with 1 entries (1 files):
- antioxidants-1375662-supplementary materials (1).pdf
